# Supplementary material
Source: PubMed Central journal article supplement (PMC2048785)
Supplement: plntphys_pp.107.104851_1.pdf [file plntphys_pp.107.104851_1.pdf]

## SUPPLEMENTAL MATERIAL

### Supplemental material and methods

***Agrobacterium*-mediated transient transformation** For transient transformation of *A. thaliana* ABA-mutants (*aba3-1*, *abi3-1*, *abi2-1*, *abi1-1*, *abi1-1R4*, *abi1-1R5*) and wild-type plants (Col-0, Ler), grown under short day conditions (8 h light, 22 °C and 16 h darkness, 16 °C), *Agrobacterium* GV3101 (pMP90; Koncz and Schell, 1986) used. This strain harbored the binary plasmid pMDC164 for expression of GUS under control of the 2x CaMV-35S promoter and was mixed with strain 19K (Latz et al., 2007) before infiltration in order to prevent gene silencing. Growth of agrobacteria and infiltration into leaves (agroinfiltration) was carried out as described in (Zipfel et al., 2006) with minor modifications. The bacterial pellet of the overnight cultures was transferred to induction medium with 150 µM acetosyringone and incubated at room temperature for at least 2 h in the dark. The mixture of both agrobacterium strains (5 ml GV3101 + 1 ml 19K) was diluted (OD<sub>600</sub> ca. 0.6) and used for pressure infiltration with a syringe of 2-3 month-old *Arabidopsis* leaves or injected into the base of inflorescence stalks of 3-4 month-old plants.

**β-Glucuronidase (GUS) Activity Assays** Qualitative and quantitative determination of GUS activity was performed according to (Jefferson et al., 1987) using 4 to 7 day-old *Arabidopsis* leaves. All solutions were infiltrated under vacuum (each 3 times for 5 minutes). For visualization of GUS-staining chlorophyll of the leaves was removed and pictures were taken with a scanner (HP Scanjet 8200). Fluorometric quantification of GUS activity was performed in a microplate fluorometer (Fluoroskan Ascent, Labsystems, Finland) using an excitation wavelength of 355 nm and an emission wavelength of 460 nm. Protein concentrations were measured at OD<sub>595</sub> in a microplate reader (Dynex MRX-TC Revelation; Dynex Technologies, Denkendorf, Germany) applying the protein-dye-binding assay, using Roti<sup>®</sup>-Nanoquant (Roth, Karlsruhe, Germany) with BSA as a standard.

## Supplemental figure and table legends

**Supplemental Figure S1:** Expression pattern of ABA-biosynthesis genes in tumors.

**A** Ethylene is synthesized from methionin via s-adenosyl-methionin (AdoMet) and 1-aminocyclopropane-1-carboxylic acid (ACC). The ACC-synthases (ACS8; AT4G37770; ACS2; AT1G01480) are required for conversion from AdoMet to ACC, which is oxidized by the ACC oxidase (ACO1; AT2G19590) to ethylene (for review see Chae and Kieber, 2005).

**B** Violaxanthin is synthesized from zeaxanthin by zeaxanthin epoxidase, AtZEP (At5g67030). The cleavage of cis-xanthophylls is catalyzed by a family of 9-cis-epoxycarotenoid dioxygenases, AtNCEDs (AtNCED1, At3g63520; AtNCED 2, At4g18350, AtNCED 3, At3g14440, AtNCED4, At4g19170, AtNCED 5, At1g78390 and AtNCED 6, At3g24220). Xanthoxal is then converted by a short-chain alcohol dehydrogenase (ABA2, At1g52340) into abscisic aldehyde, which is oxidized by an abscisic aldehyde oxidase (AAO3, At2g27150) into ABA. AAO3 protein contains a molybdenum co-factor activated by Mo-Co sulfurase. The members of the CYP70A family (AT2G29090; AT3G19270; AT4G19230; AT5G45340) catalyze ABA 8'-hydroxylation, a key step of ABA degradation (for review see Nambara and Marion-Poll, 2005).

Gene expression data are derived from studies of the tumor transcriptome using *Affymetrix* microarrays of *Arabidopsis* (Deeken et al., 2006). Differential expression of relevant genes is indicated either with ( $\leftrightarrow$ ) for unchanged, with ( $\uparrow$ ) for higher or with ( $\downarrow$ ) for lower transcript levels in tumors compared to inflorescence stalks.

**Supplemental Figure S2:** Transient GUS expression in mutant plants, either impaired in ABA synthesis (*aba3-1*; wildtype Col-0) or ABA signaling (*abi2-1*, *abi2-2*, *abi3-1*; wildtype Ler) as well as revertants of *abi1-1* (*abi1-1R4*, *abi1-1R5*; wildtype Ler) was compared with the respective wildtypes. **A** Three representative GUS-stained leaves of each plant line after infiltration of agrobacteria (strain GV3101) harboring a T-DNA with 2x35S::GUS. Please note that the size of leaves varies due to the genetic manipulation. **B** Three to four GUS-stained stalks of each plant line after injection of agrobacteria (strain GV3101), harboring a T-DNA with 2x35S::GUS, into the base of the inflorescence stalks. **C** Relative number of approximately 80 infiltrated leaves per line, showing GUS-staining like those in **A**, of 12 independent infiltration experiments (error bars  $\pm$  SEM). **D** Determination of the relative GUS-activity of 5 different leaves per plant line versus non-infiltrated leaves, using a fluorimetric assay with methylumbelliferine glucuronide as substrate (error bars  $\pm$  SEM). Statistical analysis was performed using one-way ANOVA with Bonferroni post hoc test and indicated no significant differences in C, D (p-value > 0.05)

**Supplemental Table S1:** Differential expression of ABA- and drought-regulated genes in *Arabidopsis* tumors. Gene expression data are derived from studies of the tumor transcriptome using *Affymetrix* microarrays of *Arabidopsis* (Deeken et al., 2006). Gene expression values (P-value <0.05), listed by gene name and gene locus were compared of tumor (value of tumors) versus inflorescence stalk tissue (value of references). Differentially expressed genes of the aquaporin family are listed separately. The fold change of normalized gene expression values, derived from four tumors and four reference stalk microarray hybridization experiments was calculated. Only fold changes of genes which met the significance criteria of a p-value <0.05 are presented.

**Supplemental Table S2:** Differential expression of genes predicted to encode enzymes of suberin biosynthesis in *Arabidopsis* tumors. Gene expression data are derived from studies of the tumor transcriptome using *Affymetrix* microarrays of *Arabidopsis* (Deeken et al., 2006). Gene expression values, listed by gene name and gene locus, were compared of tumor (value of tumors) versus inflorescence stalk tissue (value of references). The fold change of normalized gene expression values, derived from four tumor and four reference stalk microarray hybridization experiments, was calculated. Only fold changes of genes which met the significance criteria of a p-value <0.05 are presented.

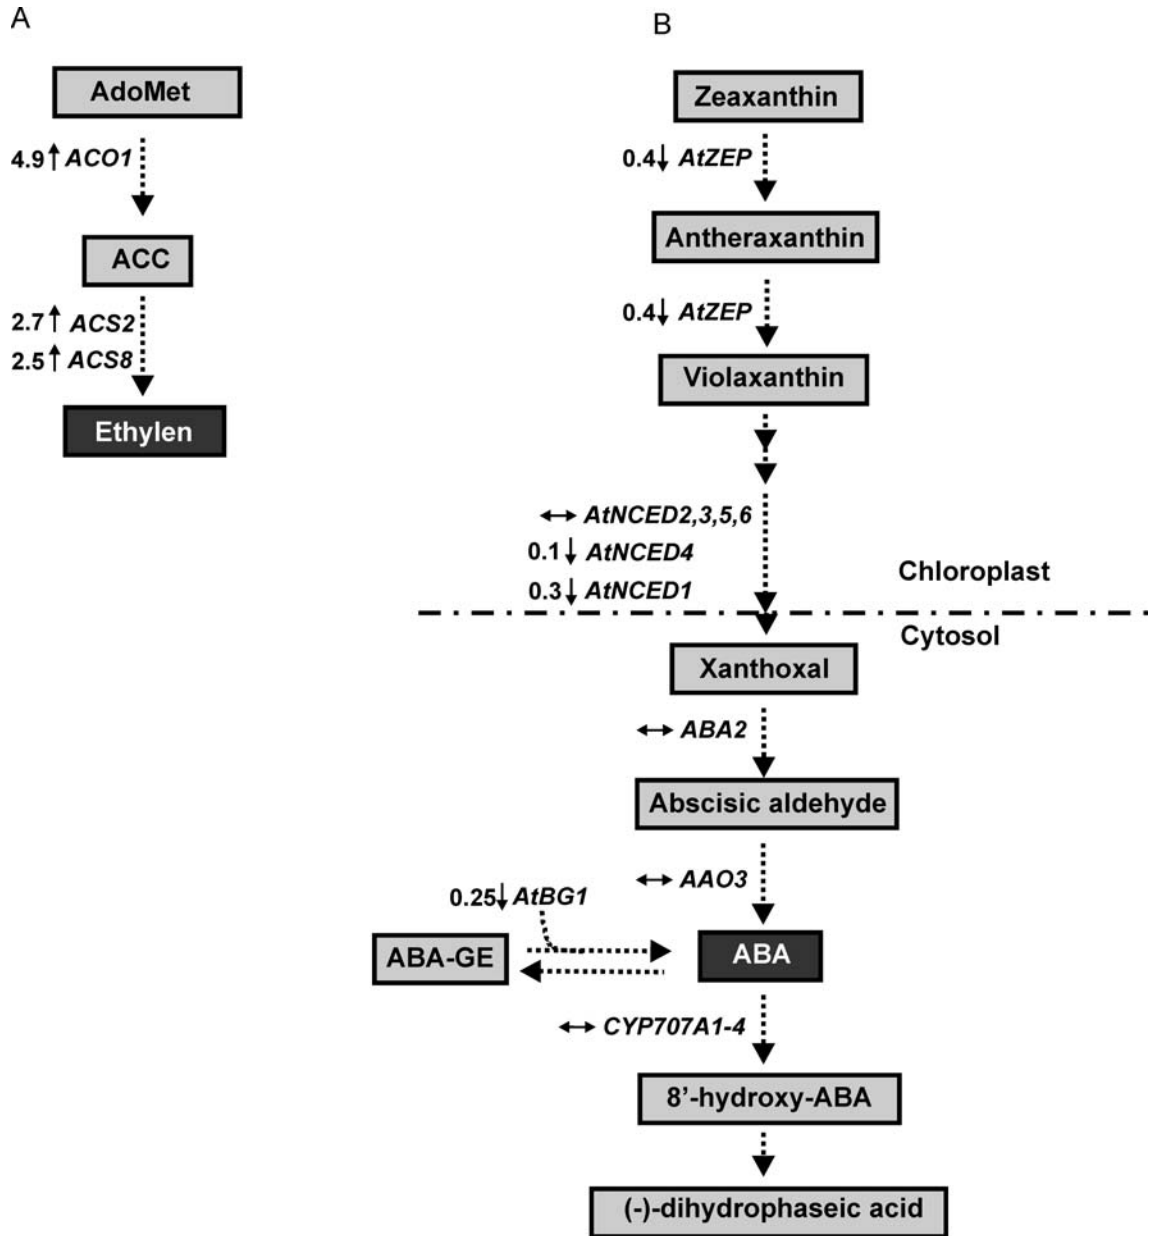

Supplemental Fig. S1

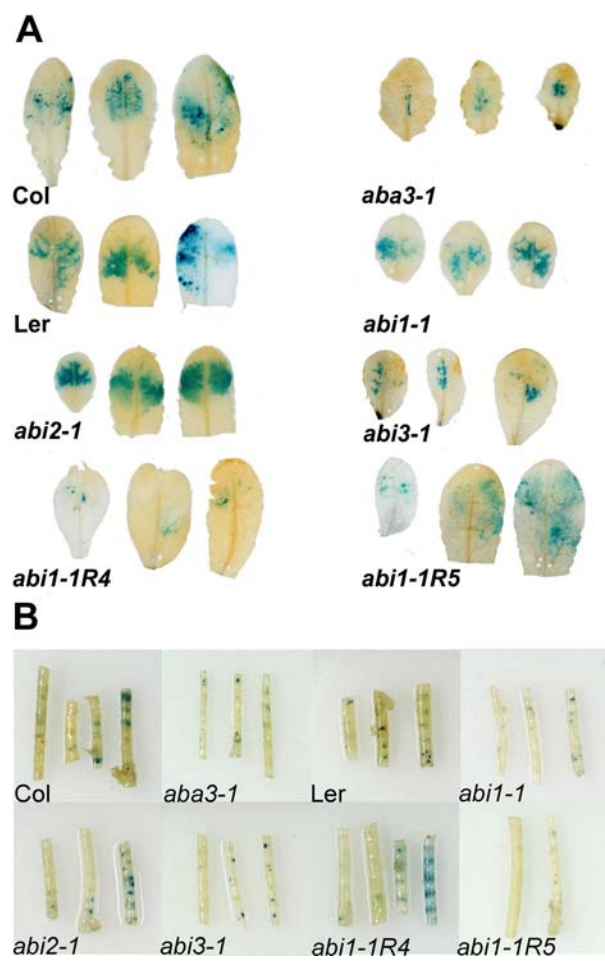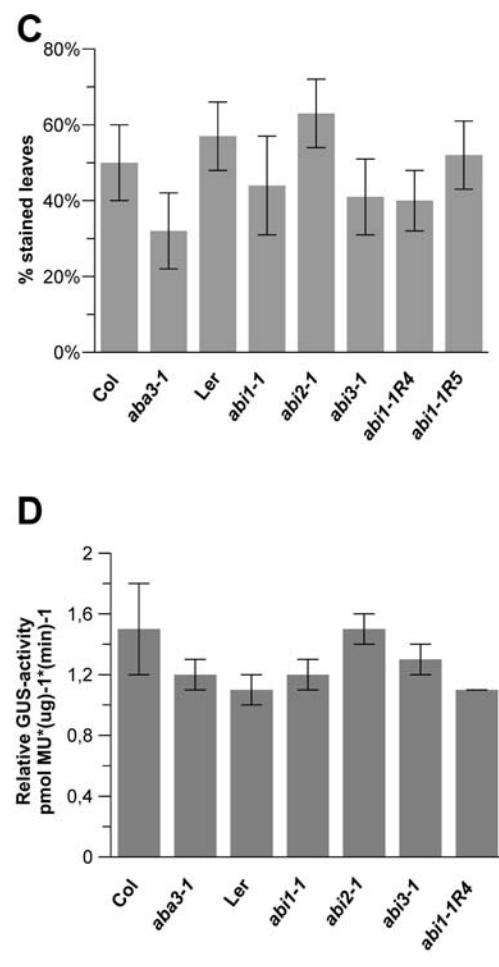

**Supplemental Fig. S2**

| <b>Supplemental Table S1 ABA- and drought responsive genes</b> |                   |                |            |                        |                            |
|----------------------------------------------------------------|-------------------|----------------|------------|------------------------|----------------------------|
| <b>Gene name</b>                                               | <b>Gene locus</b> | <b>P-value</b> | <b>FCh</b> | <b>Value of tumors</b> | <b>Value of references</b> |
| response to desiccation RD20                                   | At2g33380         | 0.00035        | 0.05       | 136                    | 2842                       |
| cold-responsive protein COR15a                                 | At2g42540         | 0.00057        | 0.16       | 42                     | 267                        |
| drought-repressed ATDR4h                                       | At1g73330         | 0.00003        | 0.16       | 207                    | 1265                       |
| cold-responsive protein COR414-TM1                             | At1g29395         | 0.00027        | 0.2        | 144                    | 692                        |
| late embryogenesis abundant protein LEA1                       | At1g32560         | 0.00070        | 0.23       | 70                     | 304                        |
| cold-responsive protein COR15b                                 | At2g42530         | 0.00015        | 0.3        | 105                    | 375                        |
| dehydrin RAB18                                                 | At5g66400         | 0.00026        | 0.3        | 128                    | 456                        |
| dehydrin COR47                                                 | At1g20440         | 0.00128        | 0.3        | 1662                   | 5561                       |
| late embryogenesis abundant protein LEA14                      | At1g01470         | 0.02699        | 0.3        | 900                    | 2902                       |
| drought-inducible gene ERD7                                    | At2g17840         | 0.00041        | 0.37       | 430                    | 1180                       |
| aldehyde dehydrogenase ALDH311                                 | At4g34240         | 0.00226        | 0.4        | 189                    | 456                        |
| dehydrin LTI29                                                 | At1g20450         | 0.01746        | 0.4        | 2040                   | 4876                       |
| calmodulin-related protein TCH2                                | At5g37770         | 0.01935        | 0.5        | 202                    | 413                        |
| drought-induced AtDI21                                         | At4g15910         | 0.00226        | 2          | 402                    | 192                        |
| Aba-response related                                           | At5g08350         | 0.00475        | 2.3        | 633                    | 275                        |
| ABA-responsive protein HVA22c                                  | At1g69700         | 0.00589        | 2.5        | 481                    | 192                        |
| Aba-response related                                           | At5g23350         | 0.00110        | 3.6        | 271                    | 74                         |
| late embryogenesis abundant protein (LEA)                      | At2g46140         | 0.00084        | 4.7        | 1326                   | 282                        |
| <b>Aquaporins</b>                                              |                   |                |            |                        |                            |
| Plasma membrane intrinsic protein PIP 2;8                      | At2g16850         | 0.0041         | 2.2        | 6690                   | 2966                       |
| Tonoplast intrinsic protein TIP 2;1                            | At3g16240         | 0.0543         | 2.4        | 2023                   | 832                        |
| NOD26-like protein NIP1;2                                      | At4g18910         | 0.0000         | 5.3        | 696                    | 131                        |
| Plasma membrane intrinsic protein PIP 1;3                      | At2g01620         | 0.0001         | 6          | 2434                   | 415                        |
| Plasma membrane intrinsic protein PIP2;5                       | At3g54820         | 0.0000         | 12.3       | 4405                   | 357                        |

| <b>Supplemental Table S2 Suberin biosynthesis</b> |                   |                |            |                        |                            |
|---------------------------------------------------|-------------------|----------------|------------|------------------------|----------------------------|
| <b>Gene name</b>                                  | <b>Gene locus</b> | <b>P-value</b> | <b>FCh</b> | <b>Value of tumors</b> | <b>Value of references</b> |
| fatty acid $\omega$ -hydrolase CYP86A1            | At5g58860         | 0.00067        | 3.4        | 419                    | 122                        |
| phenylalanine-ammonia lyase PAL1                  | At2g37040         | 0.02079        | 1.9        | 2272                   | 1198                       |
| 4-coumarate-CoA ligase 4CL2                       | At3g21240         | 0.00589        | 2.31       | 1050                   | 455                        |
| lipid-transfer protein LTP2                       | At2g38530         | 0.00023        | 10         | 2431                   | 240                        |
| peroxidase                                        | At2g38390         | 0.00001        | 35         | 4935                   | 141                        |

## References

- Chae HS, Kieber JJ** (2005) Eto Brute? Role of ACS turnover in regulating ethylene biosynthesis. *Trends Plant Sci* **10**: 291-296
- Deeken R, Engelmann JC, Efetova M, Czirjak T, Müller T, Kaiser WM, Tietz O, Krischke M, Mueller MJ, Palme K, Dandekar T, Hedrich R** (2006) An integrated view of gene expression and solute profiles of *Arabidopsis* tumors: a genome-wide approach. *Plant Cell* **18**: 3617-3634
- Jefferson RA, Kavanagh TA, Bevan MW** (1987) GUS fusions:  $\beta$ -Glucuronidase as a sensitive and versatile gene fusion marker in higher plants. *EMBO J* **6**: 3901-3907.
- Koncz C, Schell J** (1986) The promoter of TL-DNA gene 5 controls the tissue-specific expression of chimeric genes carried by a novel type of *Agrobacterium* binary vector *Mol Gen Genet* **204**: 383–396
- Latz A, Ivashikina N, Fischer S, Ache P, Sano T, Becker D, Deeken R, Hedrich R** (2007) In *planta* AKT2 subunits constitute a pH- and  $\text{Ca}^{2+}$ -sensitive inward rectifying  $\text{K}^+$  channel. *Planta* **225**: 1179-1191
- Nambara E, Marion-Poll A** (2005) Abscisic acid biosynthesis and catabolism. *Ann Rev Plant Biol* **56**: 165-185
- Zipfel C, Kunze G, Chinchilla D, Caniard A, Jones JDG, Boller T, Felix G** (2006) Perception of the bacterial PAMP EF-Tu by the receptor EFR restricts *Agrobacterium*-mediated transformation. *Cell* **125**: 749-760
